# Supplementary material for: Spectroscopic characterization of the structural properties of quinoxalinophenanthrophenazine thin films
Source: Royal Society of Chemistry journal article supplement (doi:10.1039/c7tc04757f), 2017-12-12
Supplement: c7tc04757f1.pdf [file c7tc04757f1.pdf]

Supporting Information for:

**SPECTROSCOPIC CHARACTERIZATION OF STRUCTURAL PROPERTIES OF  
QUINOXALINOPHENANTHROPHENAZINES THIN FILMS**

Ewelina Z. Frateczak,<sup>a</sup> Tomasz Makowski,<sup>b</sup> Rasha M. Moustafa,<sup>c</sup> Tarek H. El-Assaad,<sup>c</sup> Marek E. Moneta,<sup>a</sup> Pawel Uznanski,<sup>b,\*</sup> Bilal R. Kaafarani<sup>c,\*</sup>

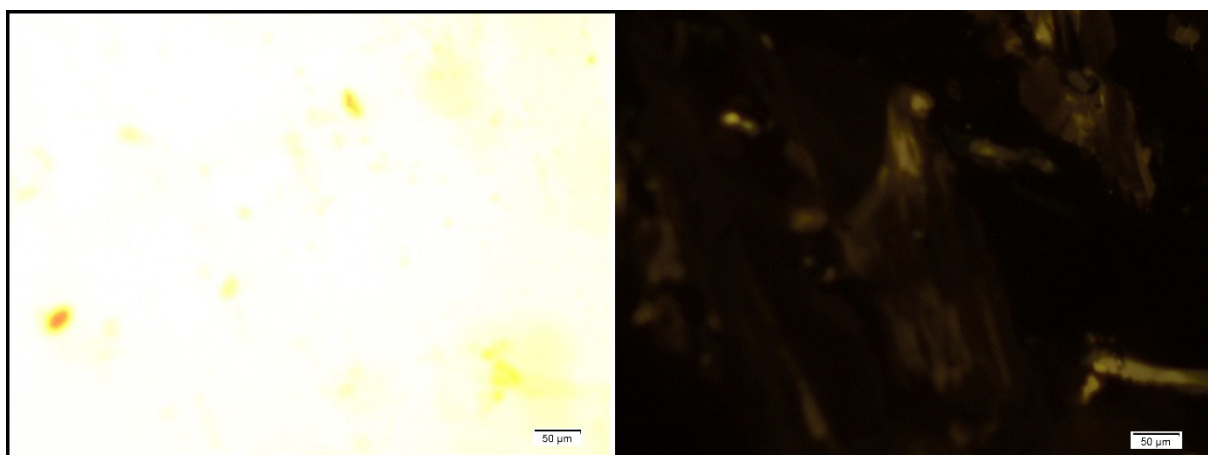

Fig. 1si. Optical microscopy images for TQPP-OC<sub>12</sub> vacuum deposited thin film taken in polarized light (left) and in crossed polarized (right).

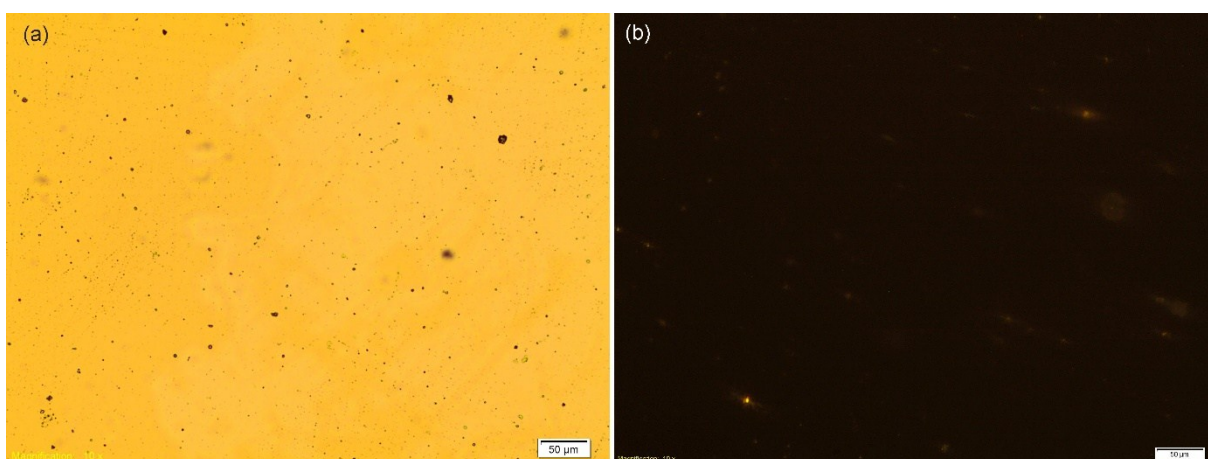

Fig. 2si. Optical microscopy images for TQPP-Me vacuum deposited thin film taken in polarized light (left) and in crossed polarized (right).

---

\* To whom correspondence should be addressed. Email: [puznansk@cbmm.lodz.pl](mailto:puznansk@cbmm.lodz.pl); [bilal.kaafarani@aub.edu.lb](mailto:bilal.kaafarani@aub.edu.lb)
